# Supplementary material for: High-throughput sequencing of pituitary and hypothalamic microRNA transcriptome associated with high rate of egg production
Source: PubMed Central journal article supplement (PMC5364632; doi:10.1186/s12864-017-3644-3), 2017-03-23
Supplement: 12864_2017_3644_MOESM1_ESM.pdf [file 12864_2017_3644_MOESM1_ESM.pdf]

Additional file 2: Figures S1-S6

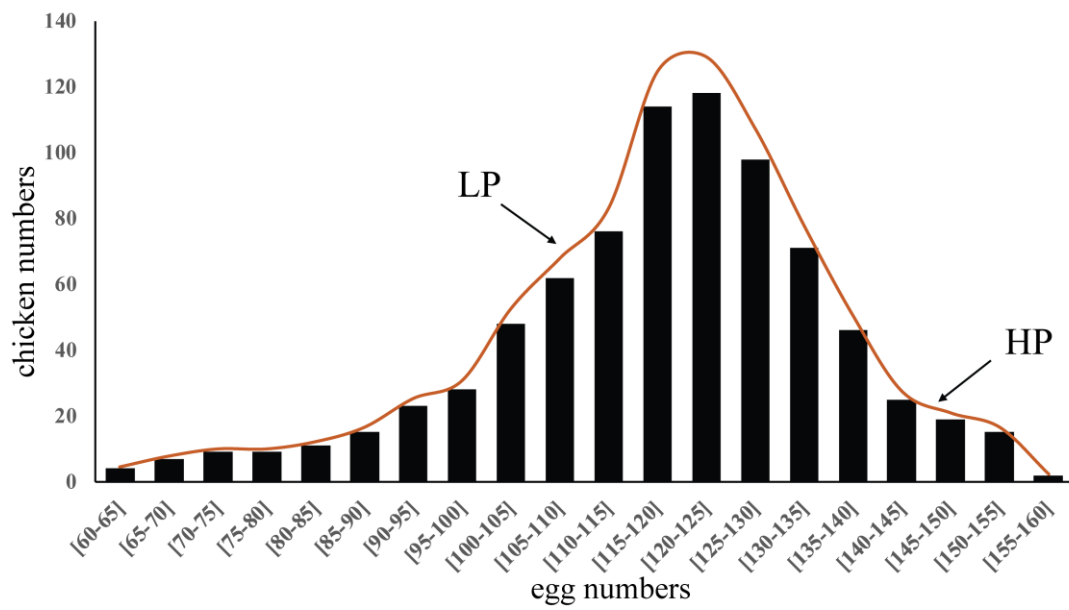

Figure S1. The egg production distribution of 800 Luhua birds at 300 days of age.

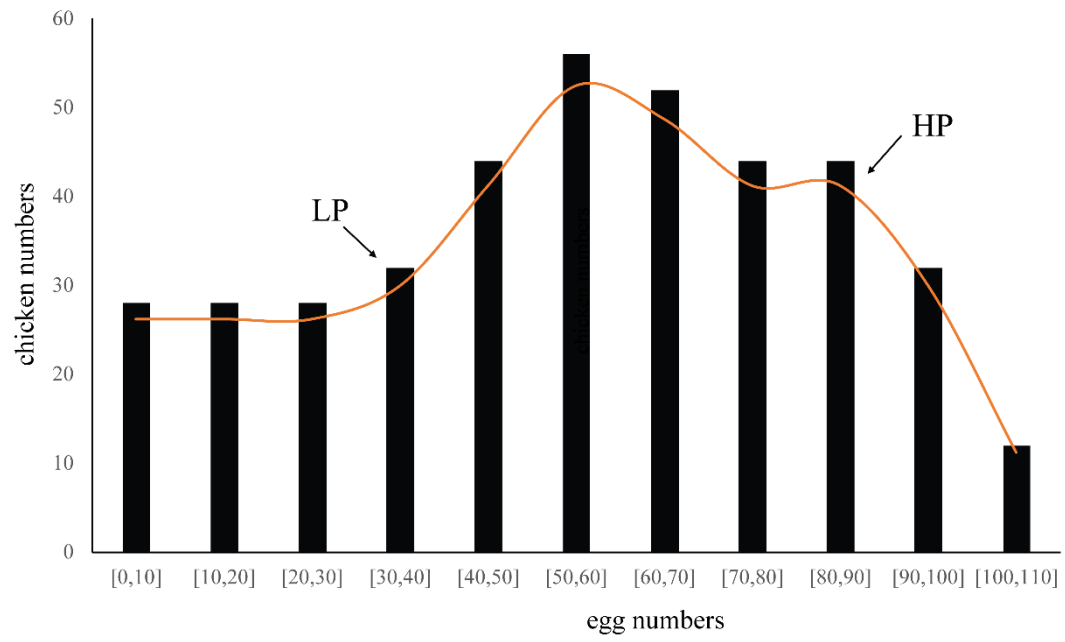

**Figure S2. The egg production distribution of 400 Jiuyuan black fowls at 300 days of age.**

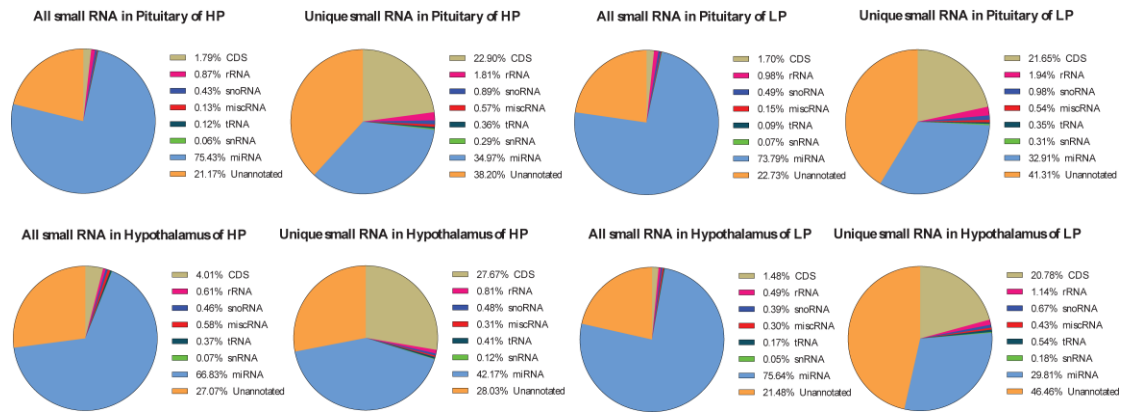

**Figure S3. Pie charts of small RNA percentages.**

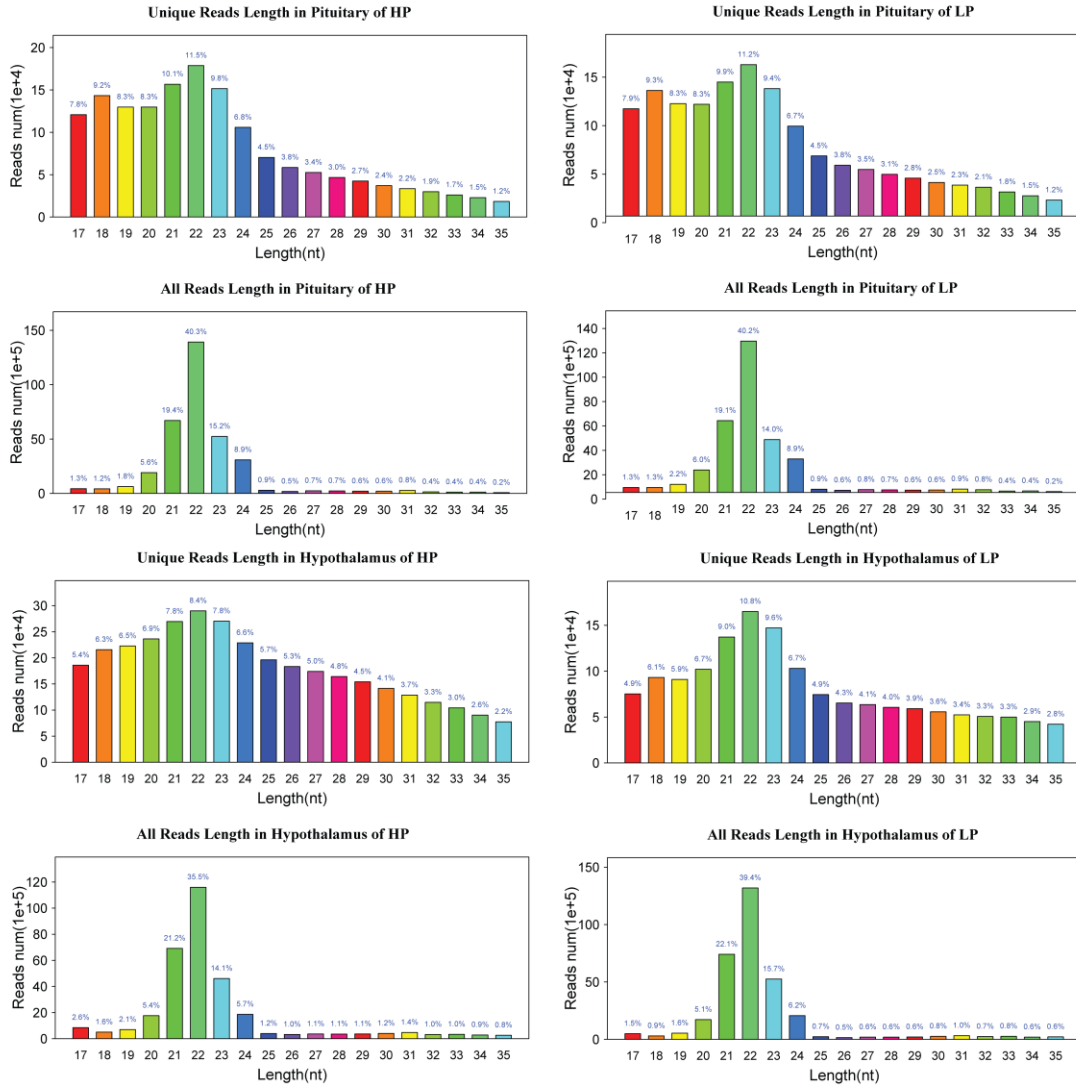

**Figure S4. Length distribution of small RNA in pituitary and hypothalamic libraries of LP and HP chickens.**

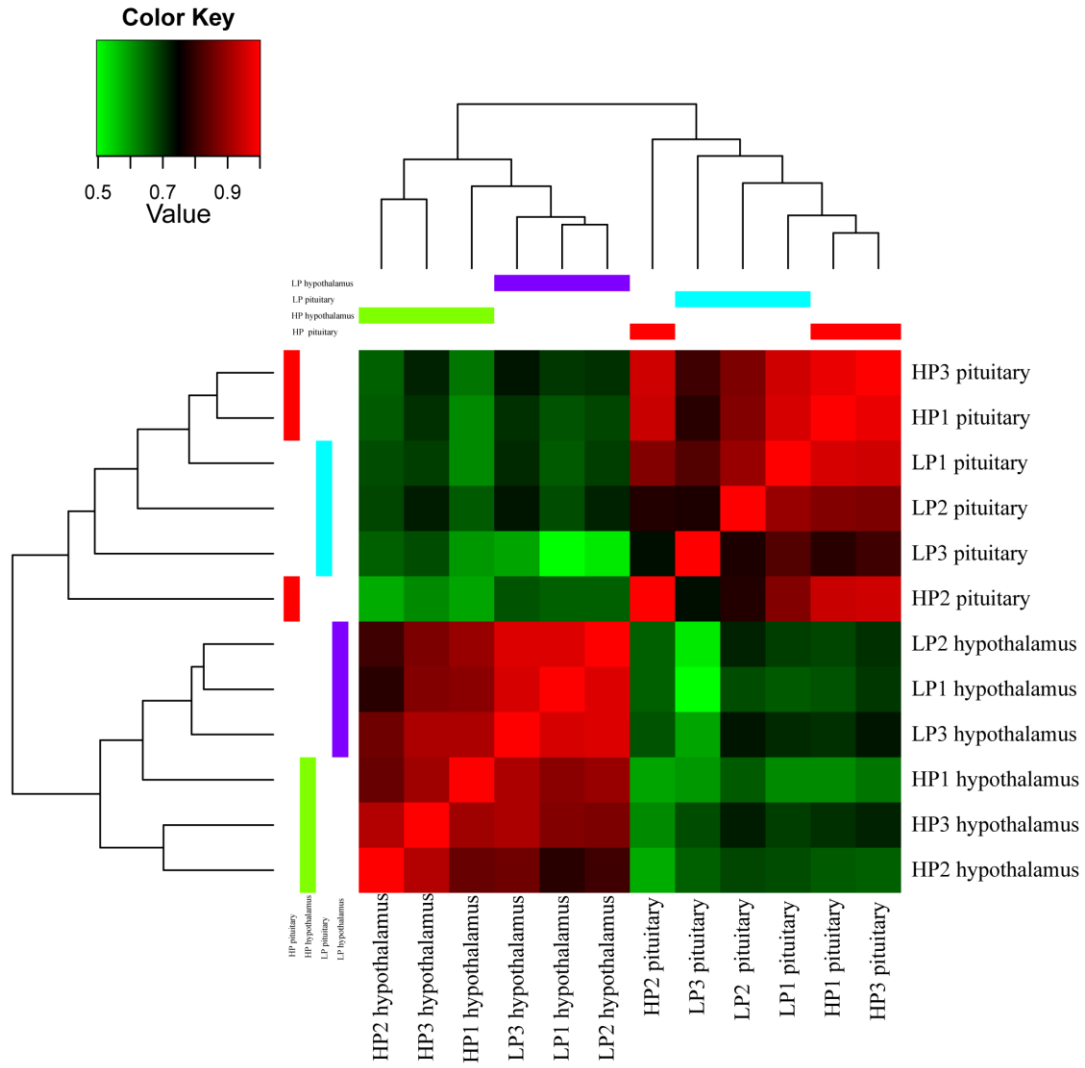

**Figure S5. Correlation analysis of miRNA expression across samples of LP and HP chickens.**

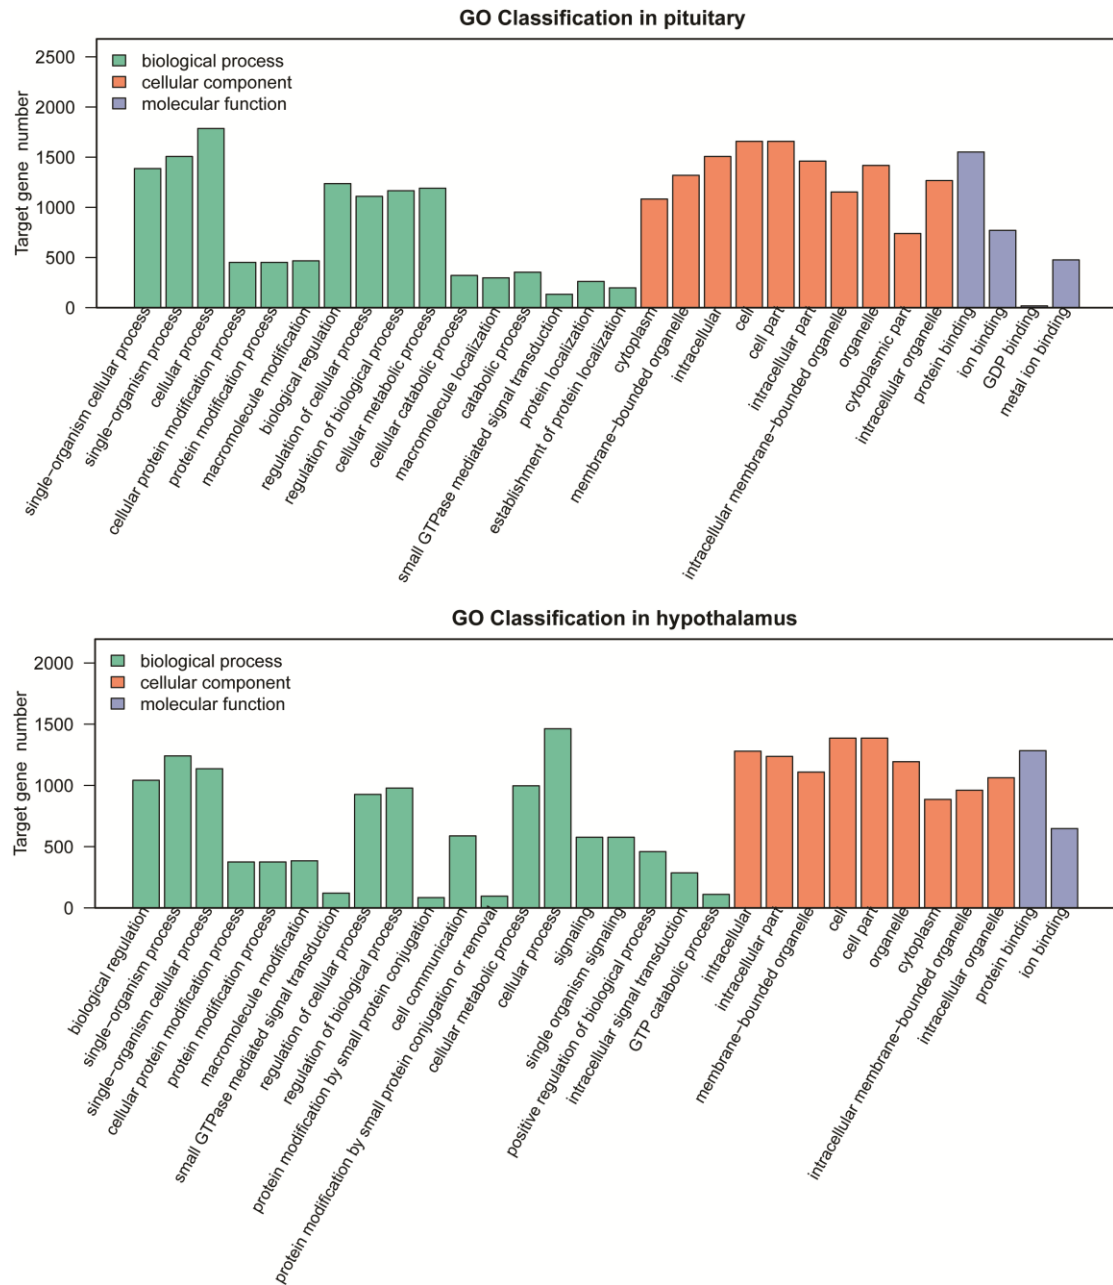

**Figure S6. Gene ontology statistics.**

The GO classification map includes the top 30 significantly enriched GO terms, which can be used to highlight significant differences in gene function.
